# Supplementary material for: Forced infiltration of silica beads into densely-packed glass fibre beds for thin composite laminates
Source: Royal Society of Chemistry journal article supplement (doi:10.1039/c6ra14969c), 2016-01-01
Supplement: c6ra14969c1.pdf [file c6ra14969c1.pdf]

## SUPPLEMENTARY INFORMATION

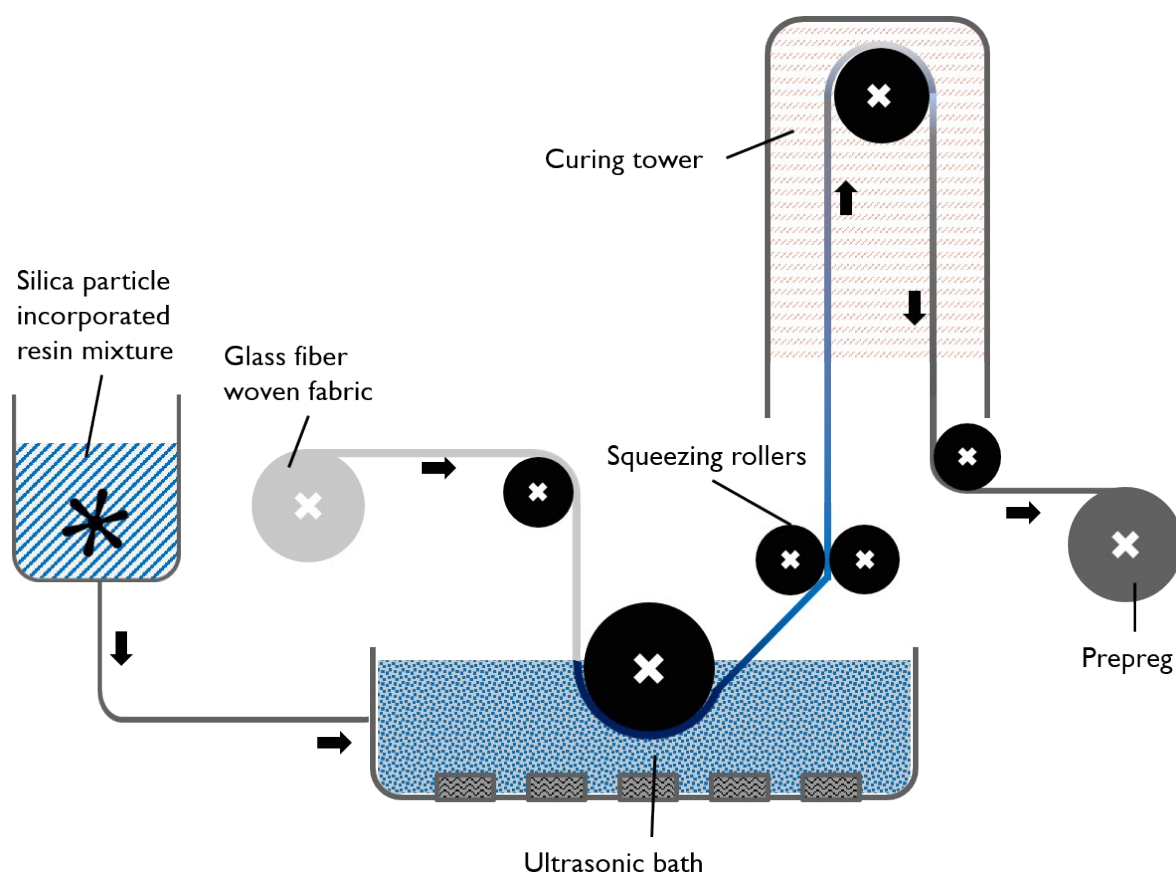

**Figure S1.** Schematic illustration of ultrasonic induced solvent impregnation process of silica bead incorporated epoxy/glass fibre prepreg.

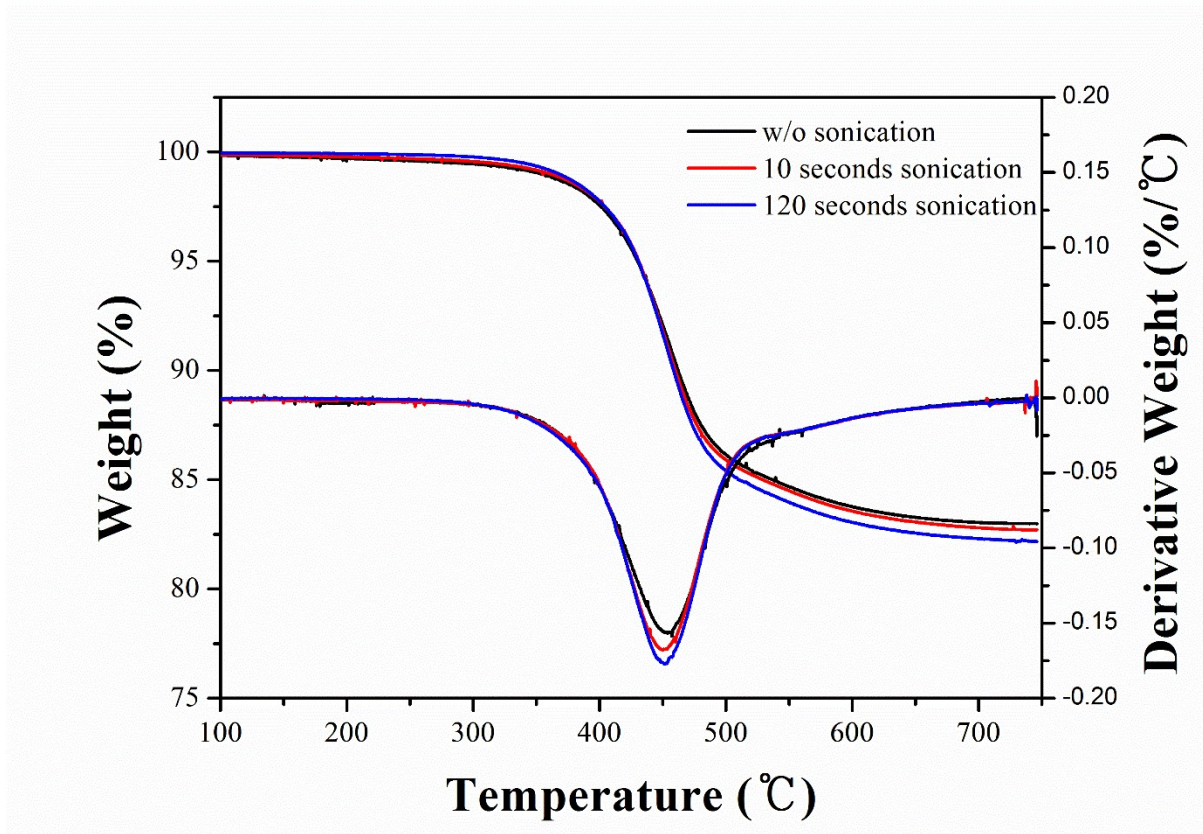

**Figure S2.** TGA curves of epoxy/glass fibre/bead composite laminate specimens w/o sonication, 10 sec sonication, and 120 sec sonication presenting similar residual weight.
